# Supplementary material for: Relationship between Insulin Levels and Nonpsychotic Dementia: A Systematic Review and Meta-Analysis
Source: Hindawi journal article supplement (doi:10.1155/2017/1230713), 2017-01-01

**Funnel Plot of Standard Error by Std diff in means**

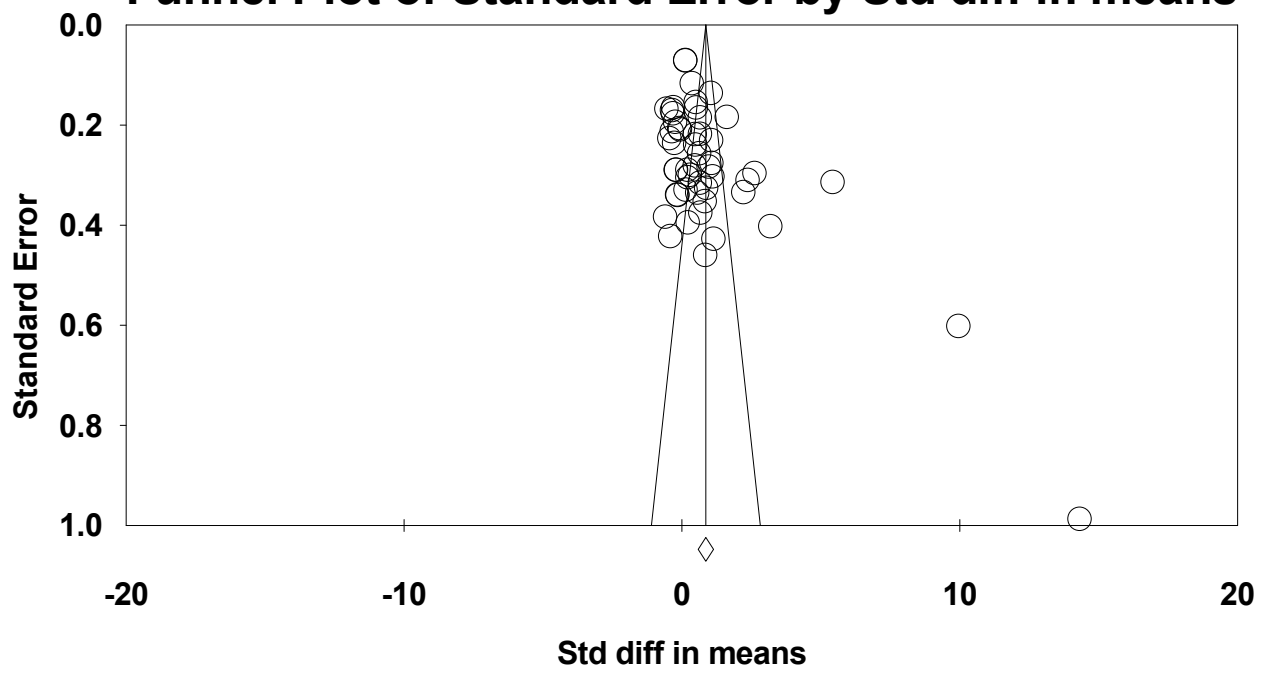

Supplement: f10 [file 1230713.f10.pdf]
